# Supplementary material for: Evaluating the FEP+ protocol for predicting binding affinity of congeneric ligands towards various soluble proteins
Source: Royal Society of Chemistry journal article supplement (doi:10.1039/d5md00748h), 2025-10-30

Supplemental information for

## Evaluating the FEP+ protocol for predicting binding affinity of congeneric ligands towards various soluble proteins

*Shashi Kumar Sampangin Venkatesh, Arpan Das, Naga Rajiv Lakkaniga\**

*Department of Chemistry and Chemical Biology, IIT(ISM) Dhanbad, Dhanbad, Jharkhand,  
India – 826004*

\*Corresponding author

Naga Rajiv Lakkaniga (NRL), Email: [nagarajiv@iitism.ac.in](mailto:nagarajiv@iitism.ac.in); Phone: +91-326-223-5550;  
ORCID ID: [orcid.org/0000-0001-8370-2224](https://orcid.org/0000-0001-8370-2224)

Figure S1: Representative image of overlap of work distributions for transformation with “good overlap”

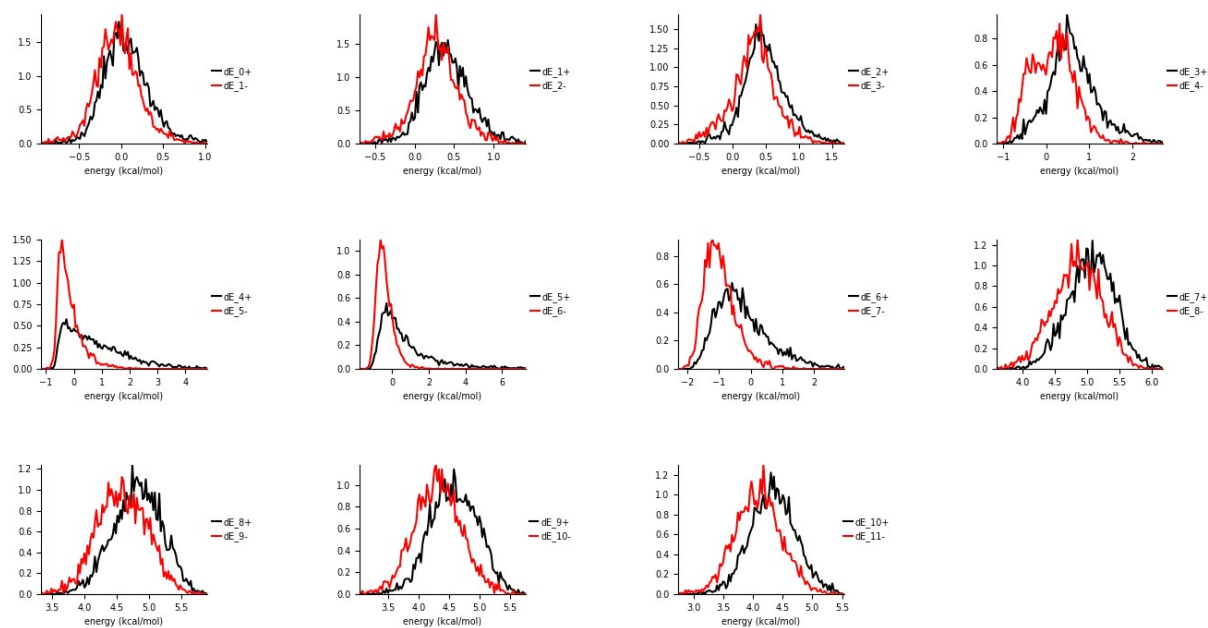

Figure S2: Representative image of overlap of work distributions for transformation with “poor overlap”

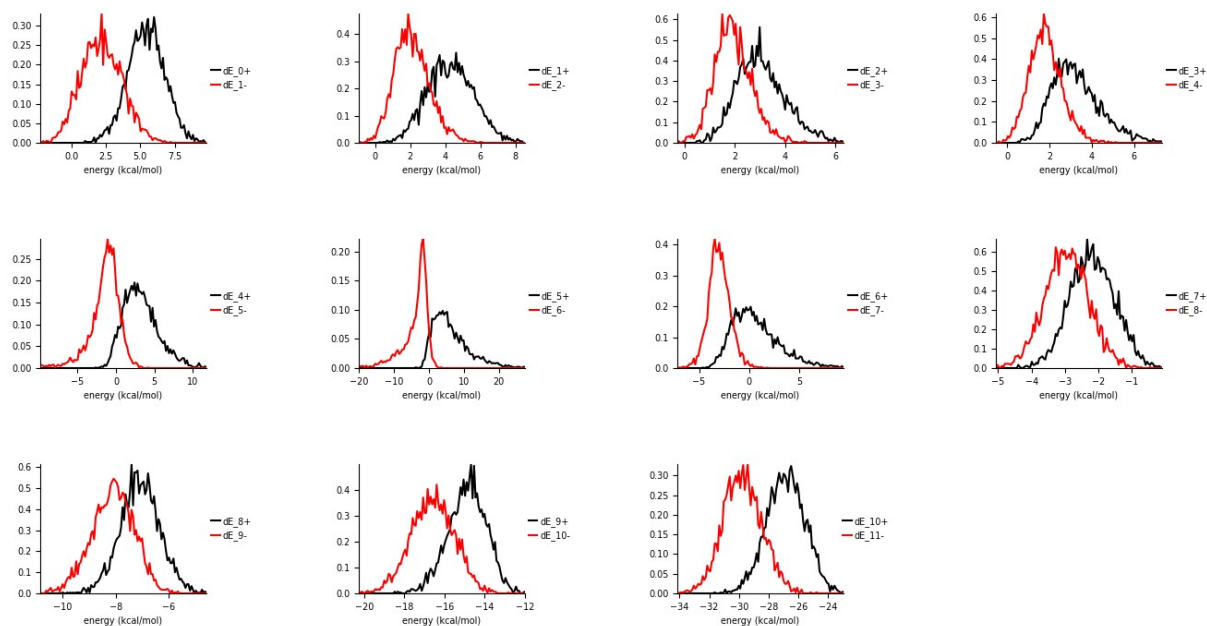

Figure S3: Overall free energy difference (dG) as a function of time of a transformation showing convergence

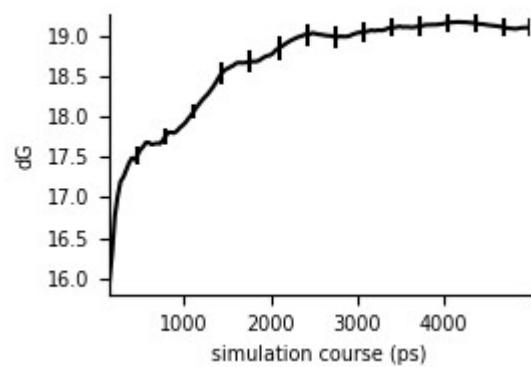

Supplement: d5md00748h1.pdf [file d5md00748h1.pdf]
